# Supplementary material for: An intercomparison of tropical cyclone best-track products for the southwest Pacific
Source: Copernicus journal article supplement (doi:10.5194/nhess-16-1431-2016), 2016-06-16
Supplement: Supplementary file 6 [file nhess-16-1431-2016-supplement.zip]

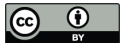

## *Supplement of*

# **An intercomparison of tropical cyclone best-track products for the southwest Pacific**

**Andrew D. Magee et al.**

*Correspondence to:* Andrew D. Magee ([andrew.magee@uon.edu.au](mailto:andrew.magee@uon.edu.au))

- [nhess-16-1431-2016-supplement-title-page.pdf](#)
- Supplement
  - [supp\\_f01.pdf](#)
  - [supp\\_f02.pdf](#)
  - [supp\\_f03.pdf](#)
  - [supp\\_f04.pdf](#)
  - [supp\\_f05.pdf](#)

The copyright of individual parts of the supplement might differ from the CC-BY 3.0 licence.
