# Supplementary figures and images for: An intercomparison of tropical cyclone best-track products for the southwest Pacific
Source: Copernicus journal article supplement (doi:10.5194/nhess-16-1431-2016), 2016-06-16

### 700hPa VORT

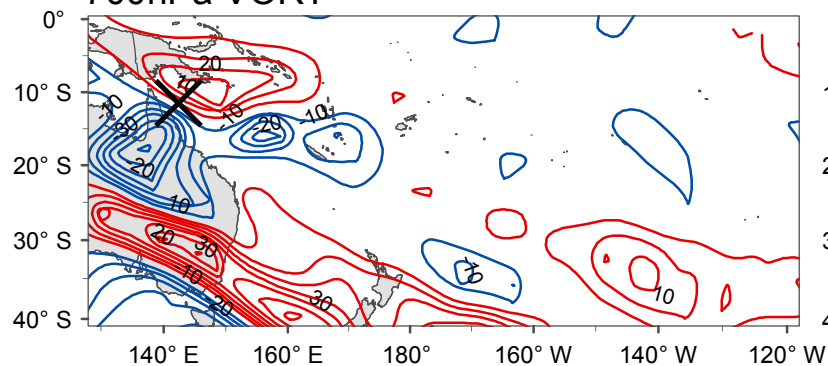

### 700hPa Winds

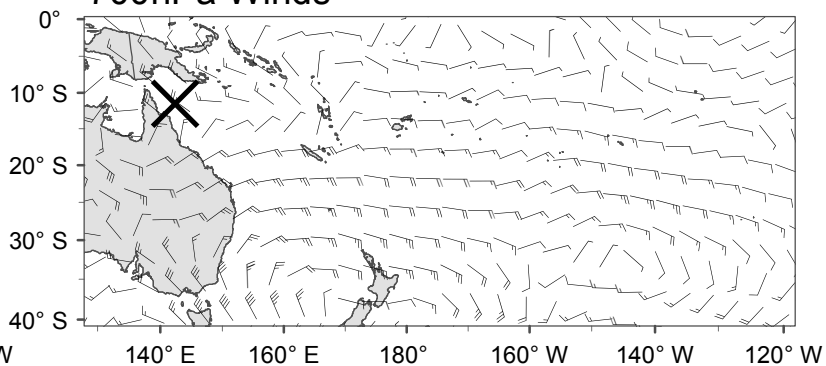

### 200hPa/850hPa EVWS

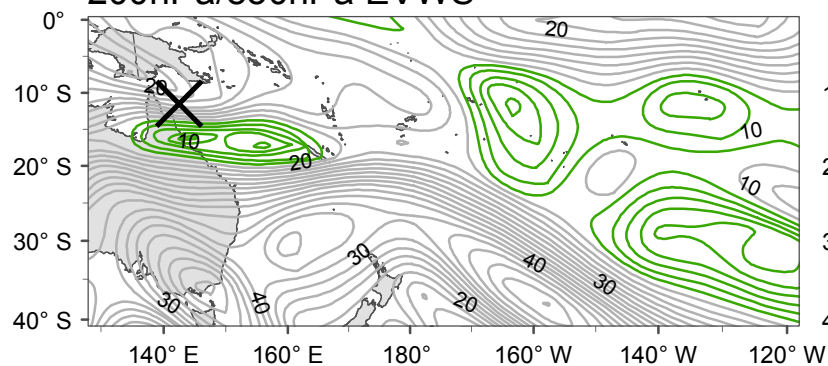

### 200hPa/850hPa VSZW

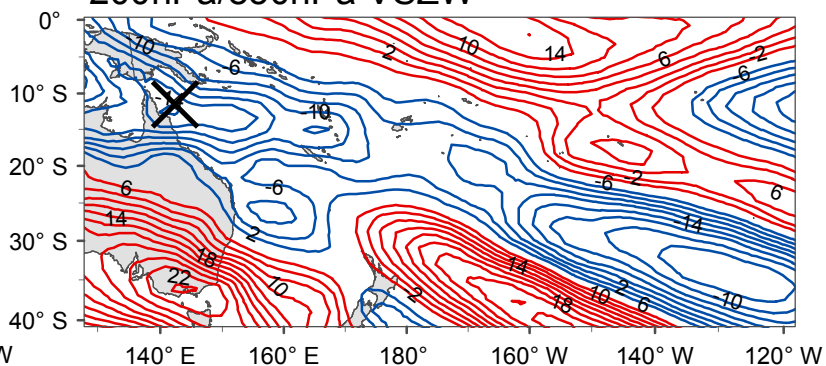

### 700hPa GPH

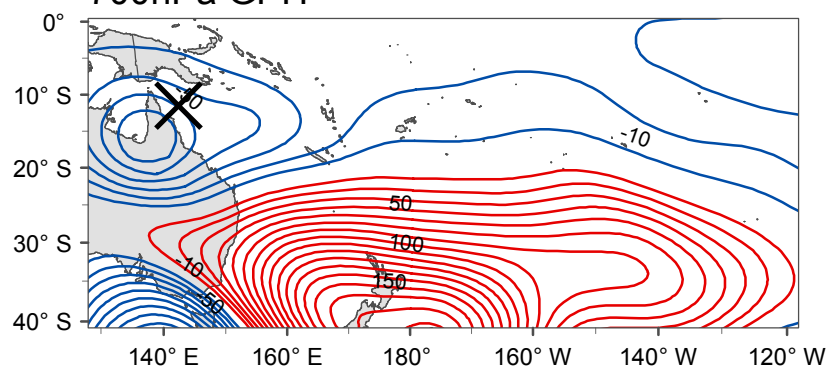

Supplement: Supplementary file 1 [file nhess-16-1431-2016-supplement.zip]

### 700hPa VORT

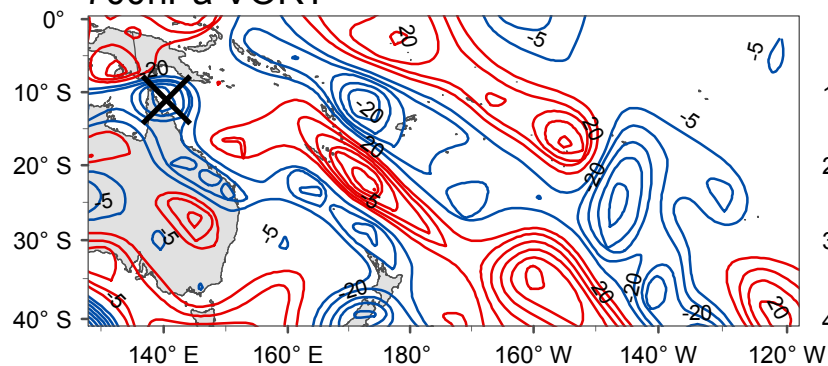

### 700hPa Winds

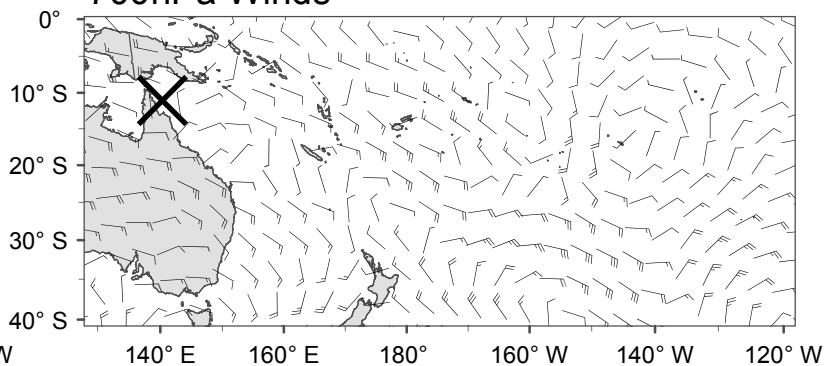

### 200hPa/850hPa EVWS

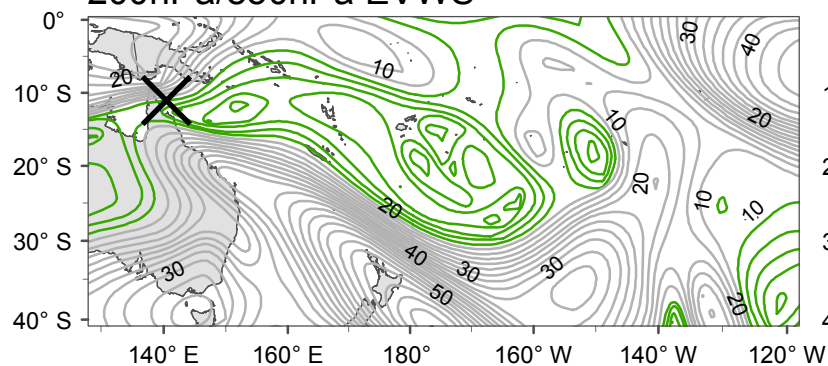

### 200hPa/850hPa VSZW

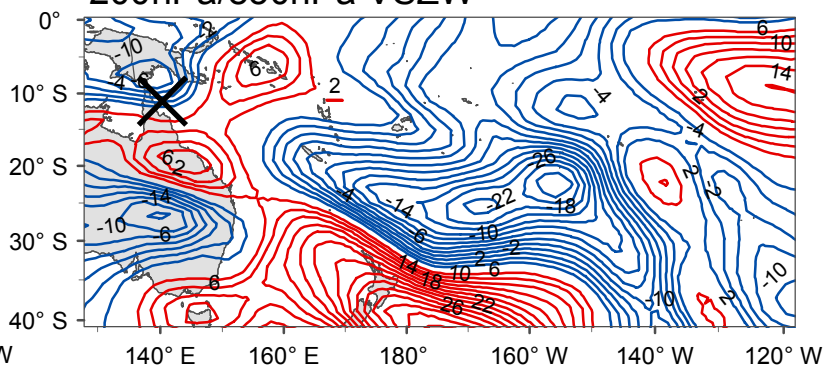

### 700hPa GPH

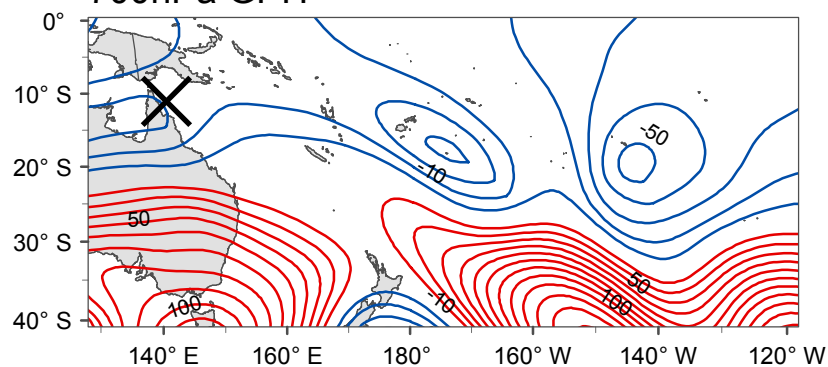

Supplement: Supplementary file 2 [file nhess-16-1431-2016-supplement.zip]

### 700hPa VORT

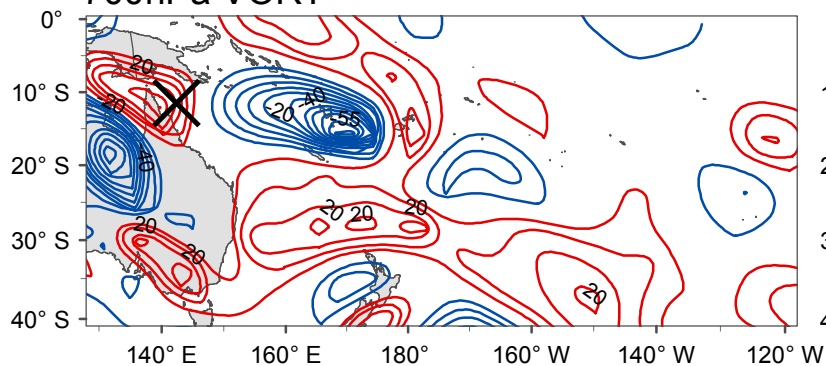

### 700hPa Winds

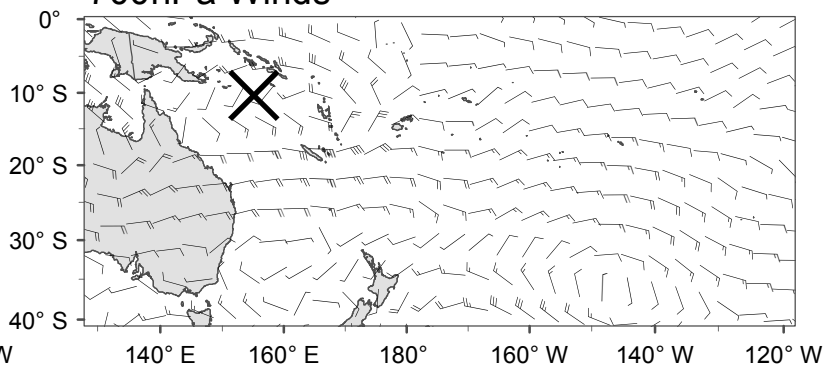

### 200hPa/850hPa EVWS

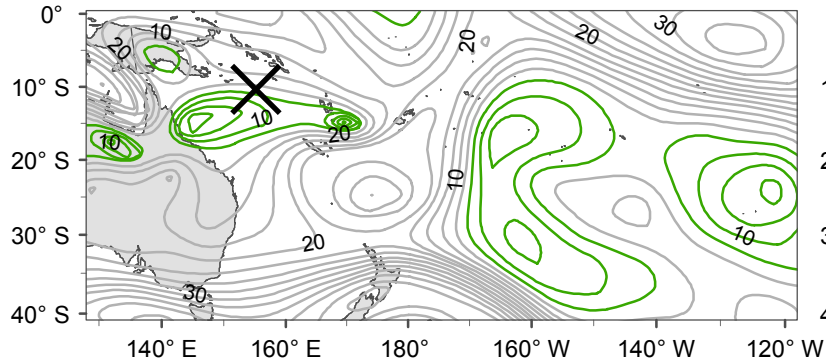

### 200hPa/850hPa VSZW

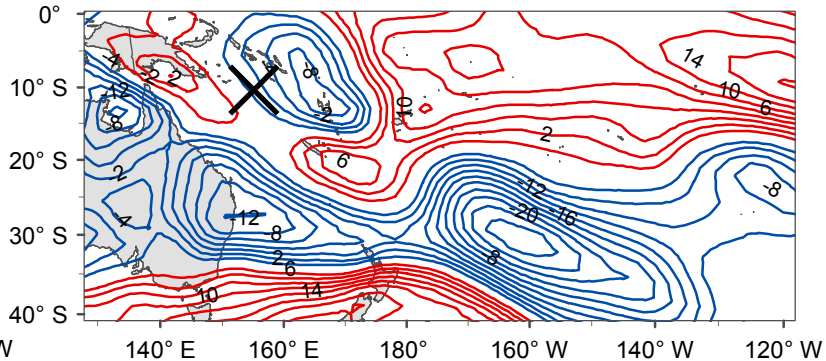

### 700hPa GPH

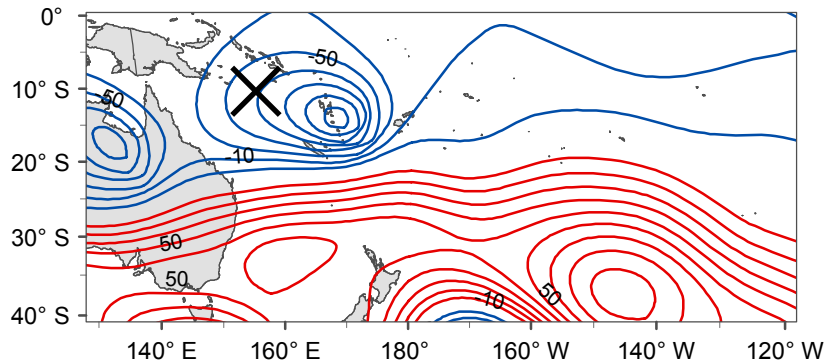

Supplement: Supplementary file 3 [file nhess-16-1431-2016-supplement.zip]

### 700hPa VORT

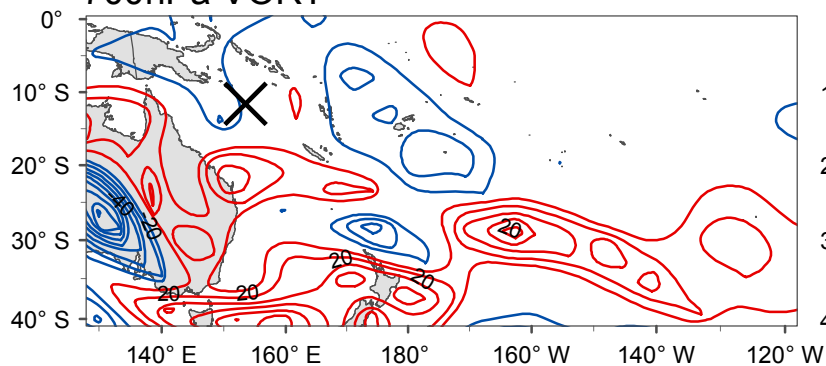

### 700hPa Winds

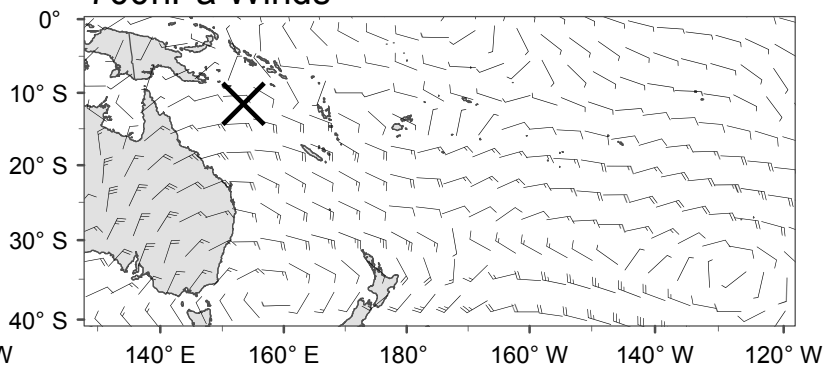

### 200hPa/850hPa EVWS

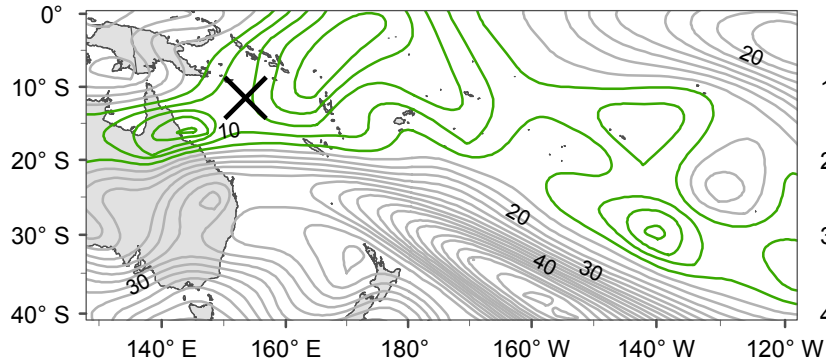

### 200hPa/850hPa VSZW

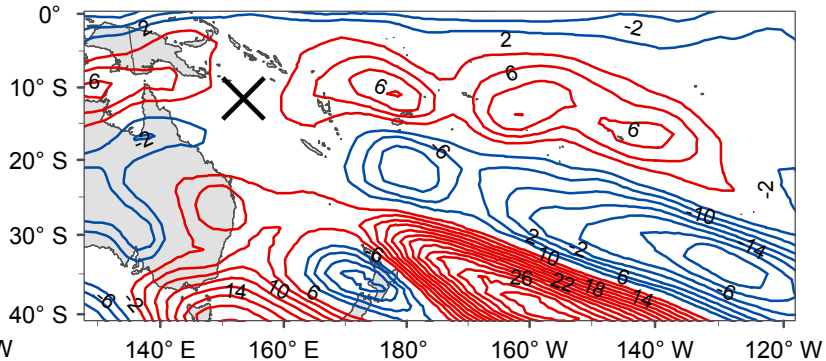

### 700hPa GPH

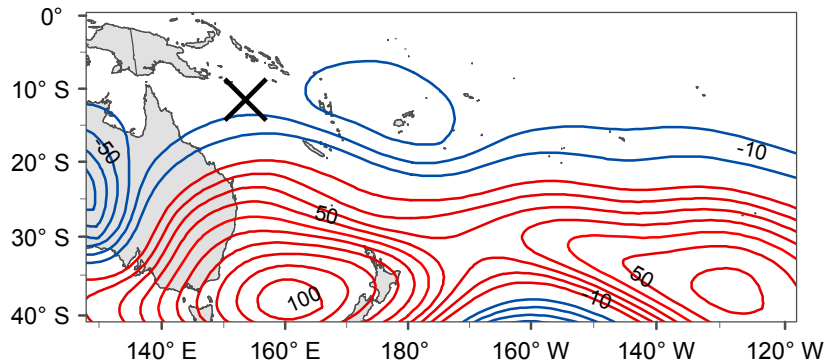

Supplement: Supplementary file 4 [file nhess-16-1431-2016-supplement.zip]

### 700hPa VORT

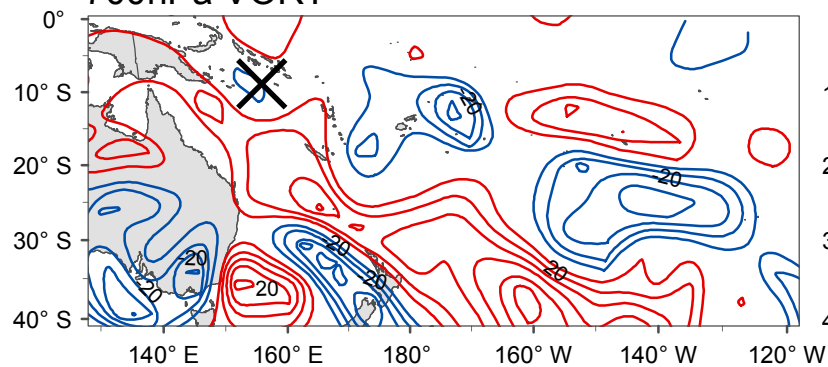

### 700hPa Winds

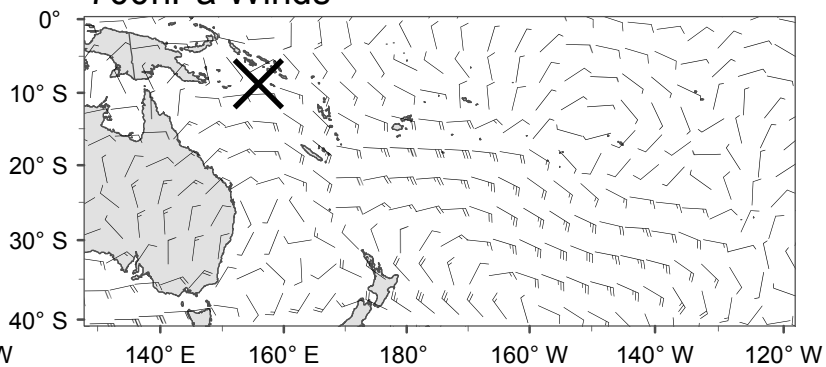

### 200hPa/850hPa EVWS

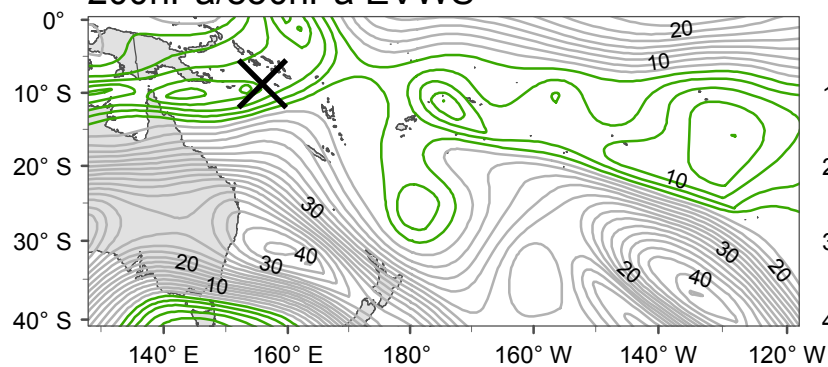

### 200hPa/850hPa VSZW

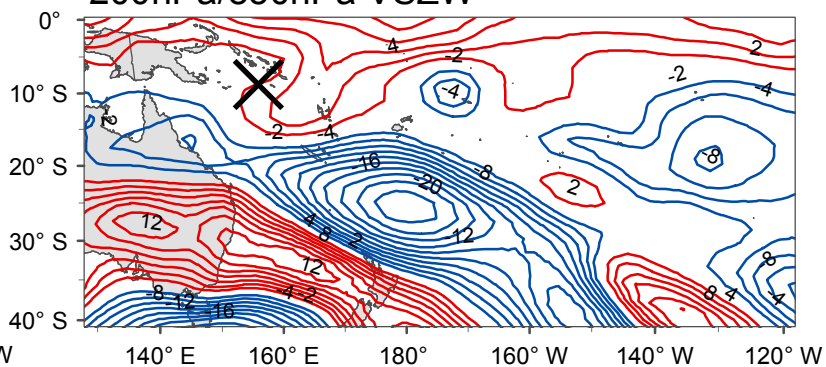

### 700hPa GPH

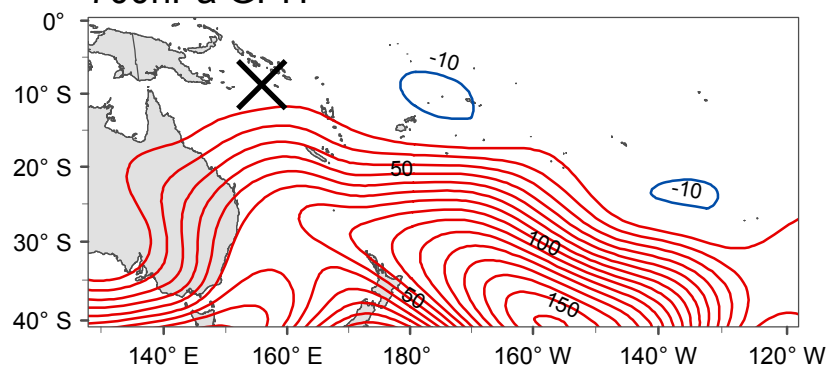

Supplement: Supplementary file 5 [file nhess-16-1431-2016-supplement.zip]
